# Supplementary material
Source: publisher figshare collection journal article supplement (https://acs.figshare.com/ndownloader/files/4061953)
Supplement: Supplementary file 1 [file 4061953]

 
data_p21c 
  
_audit_creation_method            SHELXL-97 
_chemical_name_systematic 
; 
 ? 
; 
_chemical_name_common             ? 
_chemical_melting_point           ? 
_chemical_formula_moiety          ? 
_chemical_formula_sum 
 'C38 H24 F6' 
_chemical_formula_weight          594.57 
  
loop_ 
 _atom_type_symbol 
 _atom_type_description 
 _atom_type_scat_dispersion_real 
 _atom_type_scat_dispersion_imag 
 _atom_type_scat_source 
 'C'  'C'   0.0181   0.0091 
 'International Tables Vol C Tables 4.2.6.8 and 6.1.1.4' 
 'H'  'H'   0.0000   0.0000 
 'International Tables Vol C Tables 4.2.6.8 and 6.1.1.4' 
 'F'  'F'   0.0727   0.0534 
 'International Tables Vol C Tables 4.2.6.8 and 6.1.1.4' 
  
_symmetry_cell_setting            Monoclinic 
_symmetry_space_group_name_H-M    P2(1)/c 
  
loop_ 
 _symmetry_equiv_pos_as_xyz 
 'x, y, z' 
 '-x, y+1/2, -z+1/2' 
 '-x, -y, -z' 
 'x, -y-1/2, z-1/2' 
  
_cell_length_a                    9.3688(2) 
_cell_length_b                    15.7662(4) 
_cell_length_c                    19.2029(6) 
_cell_angle_alpha                 90.00 
_cell_angle_beta                  92.351(2) 
_cell_angle_gamma                 90.00 
_cell_volume                      2834.08(13) 
_cell_formula_units_Z             4 
_cell_measurement_temperature     100(2) 
_cell_measurement_reflns_used     4380 
_cell_measurement_theta_min       3.63 
_cell_measurement_theta_max       65.77 
  
_exptl_crystal_description        block 
_exptl_crystal_colour             colourless 
_exptl_crystal_size_max           0.22 
_exptl_crystal_size_mid           0.17 
_exptl_crystal_size_min           0.15 
_exptl_crystal_density_meas       'not measured' 
_exptl_crystal_density_diffrn     1.393 
_exptl_crystal_density_method     'not measured' 
_exptl_crystal_F_000              1224 
_exptl_absorpt_coefficient_mu     0.906 
_exptl_absorpt_correction_type    multi-scan 
_exptl_absorpt_correction_T_min   0.8276 
_exptl_absorpt_correction_T_max   0.8761 
_exptl_absorpt_process_details    TWINABS 
  
_exptl_special_details 
; 
 Minimum and maximum apparent transmission:  0.604713  0.752747
 BASF   0.32731 
; 
  
_diffrn_ambient_temperature       100(2) 
_diffrn_radiation_wavelength      1.54178 
_diffrn_radiation_type            CuK\a 
_diffrn_radiation_source          'fine-focus sealed tube' 
_diffrn_radiation_monochromator   graphite 
_diffrn_measurement_device_type   'Bruker APEX-II CCD' 
_diffrn_measurement_method        '\f and \w scans' 
_diffrn_detector_area_resol_mean  ? 
_diffrn_reflns_number             8071 
_diffrn_reflns_av_R_equivalents   0.0466 
_diffrn_reflns_av_sigmaI/netI     0.0409 
_diffrn_reflns_limit_h_min        -10 
_diffrn_reflns_limit_h_max        10 
_diffrn_reflns_limit_k_min        0 
_diffrn_reflns_limit_k_max        18 
_diffrn_reflns_limit_l_min        0 
_diffrn_reflns_limit_l_max        21 
_diffrn_reflns_theta_min          3.63 
_diffrn_reflns_theta_max          61.99 
_reflns_number_total              4229 
_reflns_number_gt                 3563 
_reflns_threshold_expression      >2sigma(I) 
  
_computing_data_collection        'Bruker APEX2' 
_computing_cell_refinement        'Bruker SAINT' 
_computing_data_reduction         'Bruker SAINT' 
_computing_structure_solution     'SHELXS-97 (Sheldrick, 2008)' 
_computing_structure_refinement   'SHELXL-97 (Sheldrick, 2008)' 
_computing_molecular_graphics     'Bruker SHELXTL' 
_computing_publication_material   'Bruker SHELXTL' 
  
_refine_special_details 
; 
 Refinement of F^2^ against ALL reflections.  The weighted R-factor wR and 
 goodness of fit S are based on F^2^, conventional R-factors R are based 
 on F, with F set to zero for negative F^2^. The threshold expression of 
 F^2^ > 2sigma(F^2^) is used only for calculating R-factors(gt) etc. and is 
 not relevant to the choice of reflections for refinement.  R-factors based 
 on F^2^ are statistically about twice as large as those based on F, and R- 
 factors based on ALL data will be even larger. Hydrogen atoms were assigned
 ideal positions and refined isotropically as riding atoms. Crystal was twinned,
 this was resolved using the Cell_now program to determine unit cells, and the
 twinabs program for absorption correction.  A BASF value of 0.32731 was found
 by refinement.
; 
  
_refine_ls_structure_factor_coef  Fsqd 
_refine_ls_matrix_type            full 
_refine_ls_weighting_scheme       calc 
_refine_ls_weighting_details 
 'calc w=1/[\s^2^(Fo^2^)+(0.0652P)^2^+0.0000P] where P=(Fo^2^+2Fc^2^)/3' 
_atom_sites_solution_primary      direct 
_atom_sites_solution_secondary    difmap 
_atom_sites_solution_hydrogens    geom 
_refine_ls_hydrogen_treatment     constr 
_refine_ls_extinction_method      none 
_refine_ls_extinction_coef        ? 
_refine_ls_number_reflns          4232 
_refine_ls_number_parameters      398 
_refine_ls_number_restraints      0 
_refine_ls_R_factor_all           0.0499 
_refine_ls_R_factor_gt            0.0389 
_refine_ls_wR_factor_ref          0.0982 
_refine_ls_wR_factor_gt           0.0928 
_refine_ls_goodness_of_fit_ref    1.021 
_refine_ls_restrained_S_all       1.021 
_refine_ls_shift/su_max           0.001 
_refine_ls_shift/su_mean          0.000 
  
loop_ 
 _atom_site_label 
 _atom_site_type_symbol 
 _atom_site_fract_x 
 _atom_site_fract_y 
 _atom_site_fract_z 
 _atom_site_U_iso_or_equiv 
 _atom_site_adp_type 
 _atom_site_occupancy 
 _atom_site_symmetry_multiplicity 
 _atom_site_calc_flag 
 _atom_site_refinement_flags 
 _atom_site_disorder_assembly 
 _atom_site_disorder_group 
C1 C 0.3376(2) 0.41612(15) 0.05051(12) 0.0290(6) Uani 1 1 d . . . 
C2 C 0.3379(2) 0.47008(13) 0.11363(11) 0.0227(5) Uani 1 1 d . . . 
C3 C 0.4468(2) 0.52864(13) 0.12612(11) 0.0250(5) Uani 1 1 d . . . 
H3 H 0.5229 0.5325 0.0950 0.030 Uiso 1 1 calc R . . 
C4 C 0.4449(2) 0.58113(14) 0.18348(11) 0.0238(5) Uani 1 1 d . . . 
H4 H 0.5200 0.6209 0.1915 0.029 Uiso 1 1 calc R . . 
C5 C 0.3346(2) 0.57682(13) 0.22990(11) 0.0221(5) Uani 1 1 d . . . 
C6 C 0.2253(2) 0.51799(13) 0.21625(11) 0.0239(5) Uani 1 1 d . . . 
H6 H 0.1485 0.5143 0.2469 0.029 Uiso 1 1 calc R . . 
C7 C 0.2270(2) 0.46557(13) 0.15926(11) 0.0240(5) Uani 1 1 d . . . 
H7 H 0.1519 0.4259 0.1510 0.029 Uiso 1 1 calc R . . 
C8 C 0.3395(2) 0.62849(14) 0.29494(11) 0.0210(5) Uani 1 1 d . . . 
C9 C 0.3147(2) 0.58808(14) 0.35816(11) 0.0249(5) Uani 1 1 d . . . 
H9 H 0.2833 0.5308 0.3576 0.030 Uiso 1 1 calc R . . 
C10 C 0.3345(2) 0.62877(15) 0.42120(12) 0.0289(6) Uani 1 1 d . . . 
H10 H 0.3164 0.5999 0.4633 0.035 Uiso 1 1 calc R . . 
C11 C 0.3810(2) 0.71233(15) 0.42274(12) 0.0287(6) Uani 1 1 d . . . 
H11 H 0.3983 0.7406 0.4660 0.034 Uiso 1 1 calc R . . 
C12 C 0.4018(2) 0.75372(14) 0.36112(11) 0.0245(5) Uani 1 1 d . . . 
H12 H 0.4321 0.8112 0.3626 0.029 Uiso 1 1 calc R . . 
C13 C 0.3802(2) 0.71476(14) 0.29660(11) 0.0214(5) Uani 1 1 d . . . 
C14 C 0.4071(2) 0.76525(13) 0.23276(11) 0.0208(5) Uani 1 1 d . . . 
C15 C 0.5408(2) 0.80457(14) 0.22949(12) 0.0265(5) Uani 1 1 d . . . 
H15 H 0.6064 0.8006 0.2684 0.032 Uiso 1 1 calc R . . 
C16 C 0.5798(2) 0.84891(14) 0.17131(12) 0.0286(6) Uani 1 1 d . . . 
H16 H 0.6718 0.8741 0.1701 0.034 Uiso 1 1 calc R . . 
C17 C 0.4847(2) 0.85654(14) 0.11482(11) 0.0280(5) Uani 1 1 d . . . 
H17 H 0.5108 0.8866 0.0744 0.034 Uiso 1 1 calc R . . 
C18 C 0.3514(2) 0.82008(13) 0.11780(11) 0.0244(5) Uani 1 1 d . . . 
H18 H 0.2859 0.8263 0.0791 0.029 Uiso 1 1 calc R . . 
C19 C 0.3091(2) 0.77426(13) 0.17577(11) 0.0198(5) Uani 1 1 d . . . 
C20 C 0.1619(2) 0.73634(13) 0.17117(11) 0.0207(5) Uani 1 1 d . . . 
C21 C 0.1261(2) 0.68801(14) 0.11225(11) 0.0238(5) Uani 1 1 d . . . 
H21 H 0.1966 0.6785 0.0790 0.029 Uiso 1 1 calc R . . 
C22 C -0.0080(2) 0.65353(14) 0.10051(11) 0.0273(5) Uani 1 1 d . . . 
H22 H -0.0291 0.6208 0.0598 0.033 Uiso 1 1 calc R . . 
C23 C -0.1114(2) 0.66713(14) 0.14860(12) 0.0284(6) Uani 1 1 d . . . 
H23 H -0.2046 0.6443 0.1410 0.034 Uiso 1 1 calc R . . 
C24 C -0.0783(2) 0.71387(14) 0.20751(11) 0.0260(5) Uani 1 1 d . . . 
H24 H -0.1494 0.7218 0.2408 0.031 Uiso 1 1 calc R . . 
C25 C 0.0569(2) 0.75017(13) 0.22012(11) 0.0213(5) Uani 1 1 d . . . 
C26 C 0.0786(2) 0.80084(14) 0.28540(11) 0.0222(5) Uani 1 1 d . . . 
C27 C 0.0465(2) 0.76232(14) 0.34822(12) 0.0247(5) Uani 1 1 d . . . 
H27 H 0.0101 0.7061 0.3475 0.030 Uiso 1 1 calc R . . 
C28 C 0.0656(2) 0.80311(14) 0.41135(12) 0.0275(5) Uani 1 1 d . . . 
H28 H 0.0419 0.7754 0.4532 0.033 Uiso 1 1 calc R . . 
C29 C 0.1196(2) 0.88459(14) 0.41329(12) 0.0283(6) Uani 1 1 d . . . 
H29 H 0.1356 0.9129 0.4566 0.034 Uiso 1 1 calc R . . 
C30 C 0.1502(2) 0.92469(14) 0.35162(11) 0.0258(5) Uani 1 1 d . . . 
H30 H 0.1873 0.9808 0.3534 0.031 Uiso 1 1 calc R . . 
C31 C 0.1283(2) 0.88560(13) 0.28697(11) 0.0227(5) Uani 1 1 d . . . 
C32 C 0.1497(2) 0.93650(13) 0.22313(11) 0.0228(5) Uani 1 1 d . . . 
C33 C 0.2686(2) 0.98926(14) 0.21895(11) 0.0259(5) Uani 1 1 d . . . 
H33 H 0.3394 0.9889 0.2558 0.031 Uiso 1 1 calc R . . 
C34 C 0.2857(2) 1.04178(14) 0.16266(12) 0.0277(6) Uani 1 1 d . . . 
H34 H 0.3683 1.0766 0.1606 0.033 Uiso 1 1 calc R . . 
C35 C 0.1820(2) 1.04386(13) 0.10872(11) 0.0242(5) Uani 1 1 d . . . 
C36 C 0.0638(2) 0.99165(14) 0.11166(11) 0.0258(5) Uani 1 1 d . . . 
H36 H -0.0070 0.9924 0.0748 0.031 Uiso 1 1 calc R . . 
C37 C 0.0482(2) 0.93852(13) 0.16788(11) 0.0240(5) Uani 1 1 d . . . 
H37 H -0.0331 0.9026 0.1690 0.029 Uiso 1 1 calc R . . 
C38 C 0.2003(2) 1.09893(14) 0.04707(12) 0.0308(6) Uani 1 1 d . . . 
F1 F 0.26701(14) 0.45166(8) -0.00471(7) 0.0383(4) Uani 1 1 d . . . 
F2 F 0.46958(13) 0.39964(8) 0.02892(6) 0.0345(3) Uani 1 1 d . . . 
F3 F 0.27561(16) 0.34057(8) 0.05990(8) 0.0447(4) Uani 1 1 d . . . 
F4 F 0.25899(16) 1.05727(8) -0.00624(7) 0.0489(4) Uani 1 1 d . . . 
F5 F 0.07588(14) 1.12874(9) 0.01998(7) 0.0427(4) Uani 1 1 d . . . 
F6 F 0.28301(17) 1.16602(8) 0.06027(8) 0.0529(4) Uani 1 1 d . . . 
  
loop_ 
 _atom_site_aniso_label 
 _atom_site_aniso_U_11 
 _atom_site_aniso_U_22 
 _atom_site_aniso_U_33 
 _atom_site_aniso_U_23 
 _atom_site_aniso_U_13 
 _atom_site_aniso_U_12 
C1 0.0299(13) 0.0249(14) 0.0322(14) 0.0029(12) -0.0001(10) 0.0032(10) 
C2 0.0250(12) 0.0191(13) 0.0238(12) 0.0017(10) -0.0029(9) 0.0040(9) 
C3 0.0235(12) 0.0273(14) 0.0243(12) 0.0029(11) 0.0037(9) 0.0041(10) 
C4 0.0214(12) 0.0230(13) 0.0269(13) 0.0040(11) -0.0015(9) 0.0002(9) 
C5 0.0224(11) 0.0215(13) 0.0221(12) 0.0029(10) -0.0011(9) 0.0017(9) 
C6 0.0233(12) 0.0212(13) 0.0273(13) 0.0032(11) 0.0032(9) 0.0008(9) 
C7 0.0238(12) 0.0206(13) 0.0275(13) 0.0013(11) -0.0012(9) -0.0020(9) 
C8 0.0174(11) 0.0215(13) 0.0241(12) 0.0007(10) -0.0012(9) -0.0001(9) 
C9 0.0269(12) 0.0170(13) 0.0310(14) 0.0023(11) 0.0017(10) -0.0019(9) 
C10 0.0346(13) 0.0280(14) 0.0242(13) 0.0032(11) -0.0001(10) 0.0005(11) 
C11 0.0328(13) 0.0292(15) 0.0239(13) -0.0045(12) -0.0021(10) 0.0006(10) 
C12 0.0229(11) 0.0215(13) 0.0287(14) -0.0004(11) -0.0019(9) -0.0013(10) 
C13 0.0153(11) 0.0240(13) 0.0248(12) -0.0011(11) -0.0009(8) -0.0003(9) 
C14 0.0229(11) 0.0167(13) 0.0230(13) -0.0030(10) 0.0036(9) -0.0005(9) 
C15 0.0219(12) 0.0234(14) 0.0342(14) -0.0017(11) -0.0002(10) -0.0021(10) 
C16 0.0207(12) 0.0272(14) 0.0385(14) 0.0011(12) 0.0070(10) -0.0054(10) 
C17 0.0295(12) 0.0264(14) 0.0288(13) 0.0048(12) 0.0090(10) -0.0017(10) 
C18 0.0252(12) 0.0252(14) 0.0230(12) -0.0007(11) 0.0027(9) 0.0028(10) 
C19 0.0228(11) 0.0156(13) 0.0212(12) -0.0032(10) 0.0044(9) -0.0004(9) 
C20 0.0234(11) 0.0162(13) 0.0224(12) 0.0025(10) 0.0002(9) -0.0011(9) 
C21 0.0267(12) 0.0240(13) 0.0206(12) 0.0014(11) 0.0005(9) 0.0007(10) 
C22 0.0334(13) 0.0250(14) 0.0229(12) -0.0023(11) -0.0037(10) -0.0032(10) 
C23 0.0232(12) 0.0261(14) 0.0357(14) 0.0005(12) -0.0028(10) -0.0051(10) 
C24 0.0232(12) 0.0243(14) 0.0307(13) -0.0023(12) 0.0049(10) -0.0025(9) 
C25 0.0229(12) 0.0169(13) 0.0243(12) 0.0014(10) 0.0022(9) -0.0004(9) 
C26 0.0173(11) 0.0221(13) 0.0273(13) -0.0028(11) 0.0025(9) -0.0003(9) 
C27 0.0221(12) 0.0226(14) 0.0296(13) -0.0012(11) 0.0049(9) -0.0005(9) 
C28 0.0299(12) 0.0276(15) 0.0253(13) 0.0000(12) 0.0041(10) 0.0006(11) 
C29 0.0310(13) 0.0271(14) 0.0268(13) -0.0092(11) 0.0006(10) 0.0007(10) 
C30 0.0271(12) 0.0186(13) 0.0317(14) -0.0043(12) 0.0022(10) -0.0022(10) 
C31 0.0183(11) 0.0236(13) 0.0264(12) -0.0023(11) 0.0026(9) 0.0022(10) 
C32 0.0221(12) 0.0182(13) 0.0283(13) -0.0027(11) 0.0034(9) 0.0049(9) 
C33 0.0251(12) 0.0233(13) 0.0290(13) -0.0010(11) -0.0015(9) -0.0014(10) 
C34 0.0243(13) 0.0192(14) 0.0399(15) -0.0032(11) 0.0048(10) -0.0034(10) 
C35 0.0260(12) 0.0183(13) 0.0288(13) -0.0012(11) 0.0056(10) 0.0031(9) 
C36 0.0240(12) 0.0252(13) 0.0284(13) -0.0030(11) 0.0009(9) 0.0021(10) 
C37 0.0202(12) 0.0198(13) 0.0323(13) -0.0026(11) 0.0037(10) -0.0009(9) 
C38 0.0377(15) 0.0195(14) 0.0354(15) -0.0037(12) 0.0040(11) 0.0003(11) 
F1 0.0434(8) 0.0389(9) 0.0313(8) -0.0056(7) -0.0130(6) 0.0103(6) 
F2 0.0373(8) 0.0356(8) 0.0309(7) -0.0028(7) 0.0029(6) 0.0107(6) 
F3 0.0604(9) 0.0242(8) 0.0503(9) -0.0101(7) 0.0124(7) -0.0100(7) 
F4 0.0661(10) 0.0351(9) 0.0477(9) 0.0054(7) 0.0299(8) 0.0081(7) 
F5 0.0464(9) 0.0411(9) 0.0404(8) 0.0106(7) 0.0017(7) 0.0103(7) 
F6 0.0697(11) 0.0306(9) 0.0573(10) 0.0106(8) -0.0081(8) -0.0229(8) 
  
_geom_special_details 
; 
 All esds (except the esd in the dihedral angle between two l.s. planes) 
 are estimated using the full covariance matrix.  The cell esds are taken 
 into account individually in the estimation of esds in distances, angles 
 and torsion angles; correlations between esds in cell parameters are only 
 used when they are defined by crystal symmetry.  An approximate (isotropic) 
 treatment of cell esds is used for estimating esds involving l.s. planes. 
; 
  
loop_ 
 _geom_bond_atom_site_label_1 
 _geom_bond_atom_site_label_2 
 _geom_bond_distance 
 _geom_bond_site_symmetry_2 
 _geom_bond_publ_flag 
C1 F3 1.341(2) . ? 
C1 F2 1.346(2) . ? 
C1 F1 1.348(2) . ? 
C1 C2 1.481(3) . ? 
C2 C7 1.388(3) . ? 
C2 C3 1.390(3) . ? 
C3 C4 1.378(3) . ? 
C3 H3 0.9500 . ? 
C4 C5 1.394(3) . ? 
C4 H4 0.9500 . ? 
C5 C6 1.399(3) . ? 
C5 C8 1.490(3) . ? 
C6 C7 1.372(3) . ? 
C6 H6 0.9500 . ? 
C7 H7 0.9500 . ? 
C8 C9 1.399(3) . ? 
C8 C13 1.413(3) . ? 
C9 C10 1.376(3) . ? 
C9 H9 0.9500 . ? 
C10 C11 1.388(3) . ? 
C10 H10 0.9500 . ? 
C11 C12 1.372(3) . ? 
C11 H11 0.9500 . ? 
C12 C13 1.390(3) . ? 
C12 H12 0.9500 . ? 
C13 C14 1.492(3) . ? 
C14 C15 1.402(3) . ? 
C14 C19 1.407(3) . ? 
C15 C16 1.380(3) . ? 
C15 H15 0.9500 . ? 
C16 C17 1.381(3) . ? 
C16 H16 0.9500 . ? 
C17 C18 1.378(3) . ? 
C17 H17 0.9500 . ? 
C18 C19 1.398(3) . ? 
C18 H18 0.9500 . ? 
C19 C20 1.502(3) . ? 
C20 C21 1.394(3) . ? 
C20 C25 1.405(3) . ? 
C21 C22 1.379(3) . ? 
C21 H21 0.9500 . ? 
C22 C23 1.382(3) . ? 
C22 H22 0.9500 . ? 
C23 C24 1.375(3) . ? 
C23 H23 0.9500 . ? 
C24 C25 1.403(3) . ? 
C24 H24 0.9500 . ? 
C25 C26 1.493(3) . ? 
C26 C27 1.394(3) . ? 
C26 C31 1.415(3) . ? 
C27 C28 1.378(3) . ? 
C27 H27 0.9500 . ? 
C28 C29 1.381(3) . ? 
C28 H28 0.9500 . ? 
C29 C30 1.383(3) . ? 
C29 H29 0.9500 . ? 
C30 C31 1.394(3) . ? 
C30 H30 0.9500 . ? 
C31 C32 1.486(3) . ? 
C32 C37 1.396(3) . ? 
C32 C33 1.395(3) . ? 
C33 C34 1.376(3) . ? 
C33 H33 0.9500 . ? 
C34 C35 1.391(3) . ? 
C34 H34 0.9500 . ? 
C35 C36 1.383(3) . ? 
C35 C38 1.484(3) . ? 
C36 C37 1.379(3) . ? 
C36 H36 0.9500 . ? 
C37 H37 0.9500 . ? 
C38 F6 1.329(2) . ? 
C38 F5 1.342(3) . ? 
C38 F4 1.352(2) . ? 
  
loop_ 
 _geom_angle_atom_site_label_1 
 _geom_angle_atom_site_label_2 
 _geom_angle_atom_site_label_3 
 _geom_angle 
 _geom_angle_site_symmetry_1 
 _geom_angle_site_symmetry_3 
 _geom_angle_publ_flag 
F3 C1 F2 106.17(18) . . ? 
F3 C1 F1 105.90(19) . . ? 
F2 C1 F1 105.36(17) . . ? 
F3 C1 C2 112.75(18) . . ? 
F2 C1 C2 113.10(18) . . ? 
F1 C1 C2 112.92(18) . . ? 
C7 C2 C3 119.2(2) . . ? 
C7 C2 C1 120.75(19) . . ? 
C3 C2 C1 119.97(19) . . ? 
C4 C3 C2 120.20(19) . . ? 
C4 C3 H3 119.9 . . ? 
C2 C3 H3 119.9 . . ? 
C3 C4 C5 121.1(2) . . ? 
C3 C4 H4 119.5 . . ? 
C5 C4 H4 119.5 . . ? 
C4 C5 C6 117.97(19) . . ? 
C4 C5 C8 120.77(19) . . ? 
C6 C5 C8 121.09(18) . . ? 
C7 C6 C5 121.07(19) . . ? 
C7 C6 H6 119.5 . . ? 
C5 C6 H6 119.5 . . ? 
C6 C7 C2 120.5(2) . . ? 
C6 C7 H7 119.8 . . ? 
C2 C7 H7 119.8 . . ? 
C9 C8 C13 118.24(19) . . ? 
C9 C8 C5 118.55(19) . . ? 
C13 C8 C5 122.97(18) . . ? 
C10 C9 C8 122.0(2) . . ? 
C10 C9 H9 119.0 . . ? 
C8 C9 H9 119.0 . . ? 
C9 C10 C11 119.5(2) . . ? 
C9 C10 H10 120.3 . . ? 
C11 C10 H10 120.3 . . ? 
C12 C11 C10 119.3(2) . . ? 
C12 C11 H11 120.4 . . ? 
C10 C11 H11 120.4 . . ? 
C11 C12 C13 122.5(2) . . ? 
C11 C12 H12 118.7 . . ? 
C13 C12 H12 118.7 . . ? 
C12 C13 C8 118.36(19) . . ? 
C12 C13 C14 118.24(19) . . ? 
C8 C13 C14 123.36(18) . . ? 
C15 C14 C19 118.47(19) . . ? 
C15 C14 C13 117.03(19) . . ? 
C19 C14 C13 124.49(18) . . ? 
C16 C15 C14 121.8(2) . . ? 
C16 C15 H15 119.1 . . ? 
C14 C15 H15 119.1 . . ? 
C15 C16 C17 119.8(2) . . ? 
C15 C16 H16 120.1 . . ? 
C17 C16 H16 120.1 . . ? 
C18 C17 C16 119.2(2) . . ? 
C18 C17 H17 120.4 . . ? 
C16 C17 H17 120.4 . . ? 
C17 C18 C19 122.4(2) . . ? 
C17 C18 H18 118.8 . . ? 
C19 C18 H18 118.8 . . ? 
C18 C19 C14 118.31(19) . . ? 
C18 C19 C20 116.64(19) . . ? 
C14 C19 C20 125.03(18) . . ? 
C21 C20 C25 118.42(18) . . ? 
C21 C20 C19 117.10(17) . . ? 
C25 C20 C19 124.39(19) . . ? 
C22 C21 C20 122.40(19) . . ? 
C22 C21 H21 118.8 . . ? 
C20 C21 H21 118.8 . . ? 
C21 C22 C23 119.2(2) . . ? 
C21 C22 H22 120.4 . . ? 
C23 C22 H22 120.4 . . ? 
C24 C23 C22 119.5(2) . . ? 
C24 C23 H23 120.2 . . ? 
C22 C23 H23 120.2 . . ? 
C23 C24 C25 122.14(19) . . ? 
C23 C24 H24 118.9 . . ? 
C25 C24 H24 118.9 . . ? 
C24 C25 C20 118.27(19) . . ? 
C24 C25 C26 117.00(18) . . ? 
C20 C25 C26 124.72(18) . . ? 
C27 C26 C31 118.39(19) . . ? 
C27 C26 C25 117.80(19) . . ? 
C31 C26 C25 123.80(18) . . ? 
C28 C27 C26 122.2(2) . . ? 
C28 C27 H27 118.9 . . ? 
C26 C27 H27 118.9 . . ? 
C27 C28 C29 119.5(2) . . ? 
C27 C28 H28 120.2 . . ? 
C29 C28 H28 120.2 . . ? 
C30 C29 C28 119.4(2) . . ? 
C30 C29 H29 120.3 . . ? 
C28 C29 H29 120.3 . . ? 
C29 C30 C31 122.2(2) . . ? 
C29 C30 H30 118.9 . . ? 
C31 C30 H30 118.9 . . ? 
C30 C31 C26 118.21(19) . . ? 
C30 C31 C32 118.45(19) . . ? 
C26 C31 C32 123.23(19) . . ? 
C37 C32 C33 117.6(2) . . ? 
C37 C32 C31 121.94(19) . . ? 
C33 C32 C31 120.30(19) . . ? 
C34 C33 C32 121.5(2) . . ? 
C34 C33 H33 119.2 . . ? 
C32 C33 H33 119.2 . . ? 
C33 C34 C35 119.9(2) . . ? 
C33 C34 H34 120.0 . . ? 
C35 C34 H34 120.0 . . ? 
C36 C35 C34 119.4(2) . . ? 
C36 C35 C38 120.0(2) . . ? 
C34 C35 C38 120.5(2) . . ? 
C37 C36 C35 120.3(2) . . ? 
C37 C36 H36 119.9 . . ? 
C35 C36 H36 119.9 . . ? 
C36 C37 C32 121.2(2) . . ? 
C36 C37 H37 119.4 . . ? 
C32 C37 H37 119.4 . . ? 
F6 C38 F5 106.58(18) . . ? 
F6 C38 F4 106.21(19) . . ? 
F5 C38 F4 104.49(18) . . ? 
F6 C38 C35 113.53(19) . . ? 
F5 C38 C35 112.78(18) . . ? 
F4 C38 C35 112.57(18) . . ? 
  
_diffrn_measured_fraction_theta_max    0.950 
_diffrn_reflns_theta_full              61.99 
_diffrn_measured_fraction_theta_full   0.950 
_refine_diff_density_max    0.166 
_refine_diff_density_min   -0.201 
_refine_diff_density_rms    0.046 
